# 1 CRISPR/Cas9 mediated mutations as a new tool for 2 studying taste in honeybees

3 Laura Değirmenci<sup>1\*</sup>, Dietmar Geiger<sup>2</sup>, Fábio Luiz Rogé Ferreira<sup>2</sup>, Alexander  
4 Keller<sup>3</sup>, Beate Krischke<sup>4</sup>, Martin Beye<sup>5</sup>, Ingolf Steffan-Dewenter<sup>4</sup>, Ricarda  
5 Scheiner<sup>1</sup>

6 \*Corresponding author: University of Würzburg, Behavioral Physiology and Sociobiology, Biocenter, Am Hubland, 97074  
7 Würzburg, Germany. e-mail: [laura.degirmenci@uni-wuerzburg.de](mailto:laura.degirmenci@uni-wuerzburg.de)

## 8 Abstract

9 **Background:** Honeybees rely on nectar as their main source of carbohydrates [1]. Sucrose, glucose  
10 and fructose are the main components of plant nectars [2] [3]. Intriguingly, honeybees express only three  
11 putative sugar receptors (AmGr1, AmGr2 and AmGr3) [4] , which is in stark contrast to many other  
12 insects and vertebrates. The sugar receptors are only partially characterized [5] [6]. AmGr1 detects  
13 different sugars including sucrose and glucose. AmGr2 is assumed to act as a co-receptor only, while  
14 AmGr3 is assumedly a fructose receptor.

15 **Results:** We show that honeybee gustatory receptor AmGr3 is highly specialized for fructose perception  
16 when expressed in *Xenopus* oocytes. When we introduced nonsense mutations to the respective *AmGr3*  
17 gene using CRISPR/Cas9 in eggs of female workers, the resulting mutants displayed almost a complete  
18 loss of responsiveness to fructose. In contrast, responses to sucrose were normal. Nonsense mutations  
19 introduced by CRISPR/Cas9 in honeybees can thus induce a measurable behavioural change and serve  
20 to characterize the function of taste receptors *in vivo*.

21 **Conclusion:** CRISPR/Cas9 is an excellent novel tool for characterizing honeybee taste receptors *in*  
22 *vivo*. Biophysical receptor characterisation in *Xenopus* oocytes and nonsense mutation of *AmGr3* in  
23 honeybees unequivocally demonstrate that this receptor is highly specific for fructose.

## 24 **Graphical Abstract**

25 See Fig. 0.

## 26 **Keywords**

27 *AmGr3* gene, *Xenopus* characterization, sugar receptor, mutation, CRISPR/Cas9, responsiveness,  
28 proboscis extension response (PER), gustatory receptors (Grs), honeybee, artificial rearing.

## 29 **Background**

30 Honeybees (*Apis mellifera*) are not only important pollinators world-wide. The highly social insects  
31 perform an intricate division of labour and are well-known for their astonishing skills in learning and  
32 communication. When it comes to taste, however, honeybees display a rather poor set of receptors.  
33 Because plant-derived nectar is their sole source of carbohydrates, sugar perception is naturally of  
34 utmost importance for honeybees. The bees sense the sugar composition of a food source with only a  
35 few fine contact chemoreceptors on their antennal tip [7]. In contrast to many other insects such as the  
36 fruit fly (*Drosophila melanogaster*) with 68 genes and mosquitoes (*Anopheles gambiae*) with 75 genes,  
37 the genome of the honeybee comprises only ten genes coding for gustatory receptors (Grs) [4]. Among  
38 these only three code for sugar receptors: AmGr1, AmGr2 and AmGr3 [4] [8]. The taste receptors are  
39 expressed in the brain, the antennae, mouthparts, tarsi and the gut of the honeybee. With this small set  
40 of receptors honeybees evaluate a diverse set of sugars like sucrose, fructose, maltose and melicitose  
41 in nectar in varying composition and in amounts ranging from 5% to 80%. In flowers of mint plants  
42 (*Laminacea*), buttercups and clematis (*Ranunculaceae*), for example, sucrose is the main sugar,  
43 whereas other flowers such as those of oilseed rape contain relatively more glucose and fructose [3] [9].  
44 The sugar trehalose, in contrast, acts as blood sugar [10] [2].

45 How honeybees recognize the different sugars in nectar and in the inner organs with this small set of  
46 receptors is unclear. While AmGr1 was shown to detect a variety of sugars (sucrose, fructose, glucose  
47 and trehalose), AmGr2 seems to function as co-receptor only [5]. AmGr3 appears to specifically perceive  
48 fructose [6], but not all of the relevant sugars have been tested so far. The AmGr3 receptor is an ortholog  
49 of the *Drosophila* fructose receptor DmGr43a [4] and is similarly affine for fructose as the BmGr9 of the  
50 silkworm *Bombyx mori* [11]. Because AmGr3 appears to selectively respond to one sugar, it is an  
51 interesting candidate for characterizing its function through a nonsense-mutation in the *AmGr3* gene.

52 The function of insect and mouse taste receptors has been frequently characterized using  
53 electrophysiological techniques with heterologously expressed receptors in frog oocytes (*Xenopus*  
54 oocytes, [5] [6]), human liver cells (HEK cells, [11]) or plant cells (*Arabidopsis* mesophyll protoplasts,  
55 [12]). However, experimental indications from heterologous expression systems need to be verified in  
56 the original organism using knock out or knock down mutants, such as has frequently been performed  
57 in fruit flies (for review see [13]).

58 While techniques of genetic manipulation are generally not very successful in honeybees, the  
59 CRISPR/Cas9 system is a promising new genome-editing technique which has been employed  
60 successfully in numerous insects such as *Drosophila melanogaster* and *Aedes aegypti*  
61 ([14] and [15], respectively). Applications in honeybees are still rare. Kohno et al. (2016) managed to  
62 produce mosaic queens and mutated drones lacking a major royal jelly protein (*mrjp1* gene) [16]. Roth  
63 et al. (2019) applied CRISPR/Cas9 on honeybee workers to investigate the sex termination pathway  
64 and to identify genes influencing size polymorphism [17].

65 We characterized the function of the putative fructose receptor AmGr3 classically by heterologous  
66 expression in *Xenopus laevis* oocytes and elucidated its cation transport characteristics through two-  
67 electrode voltage-clamp technique (TEVC). In addition, we employed the novel CRISPR/Cas9 technique  
68 to induce specific mutations of this receptor in live honeybees and tested their responsiveness to  
69 different sugars as one-week old adults.

## 70 **Results**

### 71 **AmGr3 represents a hyperpolarisation-activated fructose receptor**

72 Our results demonstrate that AmGr3 is clearly a fructose receptor. Upon addition of 160 mM fructose to  
73 the external solution, AmGr3-expressing oocytes elicited inward cation currents (negative currents) with  
74 amplitudes of several hundred nano amps at a holding potential of -80 mV (Fig. 1A). Removing the  
75 fructose from the bath medium, the inward currents returned to the pre-fructose level. Control oocytes  
76 did not show any fructose-induced currents (Fig.1A lower panel). To study the voltage dependence of  
77 AmGr3 mediated currents, 200 ms test voltage pulses were applied in the range from +10 mV to -150  
78 mV in 20 mV decrements in absence and presence of fructose (Fig. 1B). Fructose-induced currents  
79 were derived by subtracting the currents in the absence of fructose from the currents in its presence

80 (Fig. 1B and C). The derived fructose-induced currents are characterized by time-dependent activation  
81 kinetics (Fig. 1B) and hyperpolarization-dependent activation (Fig. 1C).

## 82 **Fructose-activated AmGr3 mediates non-selective cation currents**

83 Gustatory receptors represent a group of (non-GPCR) seven-transmembrane receptors that detect  
84 tastants (non-volatile compounds) via contact chemo sensation. Upon ligand binding, these receptors  
85 elicit cation currents finally leading to the firing of action potentials in gustatory neurons [11]. To test the  
86 selectivity of the receptor for cations, oocytes expressing the gustatory receptor AmGr3 were perfused  
87 with external solutions containing 30 mM of different monovalent cations. The fructose-induced ionic  
88 currents were recorded at a membrane potential of -140 mV. In response to fructose perfusion, negative  
89 current deflections appeared in all cationic conditions tested (Fig. 1D). To calculate the relative  
90 permeability of AmGr3 for cations, reversal potentials in the presence of different cations and fructose  
91 were monitored. Reversal potentials appeared similar between the cations tested. AmGr3 thus seems  
92 to be a rather non-selective cation channel with a relative permeability sequence of  $K^+ = 1 \pm 0 > Rb^+ = 0.97$   
93  $\pm 0.05 > Cs^+ = 0.91 \pm 0.05 > Na^+ = 0.83 \pm 0.09 > Li^+ = 0.70 \pm 0.06$  (permeability of  $K^+$  was set to 1, mean  
94 of  $n = 5$  oocytes  $\pm$  SE).

## 95 **Fructose is the only sugar inducing AmGr3-derived currents**

96 In 2018, Takada et al. reported that the gustatory receptor AmGr3 responds only to fructose when  
97 transiently expressed in *Xenopus* oocytes [6]. To confirm these results and to broaden the list of sugars  
98 tested (by additional use of arabinose, raffinose and melezitose), we successively perfused AmGr3-  
99 expressing oocytes with different mono-, di-, and trisaccharides (160 mM each) at a membrane potential  
100 of -80 mV (Fig. 2A). Among the ten sugars tested, AmGr3 only responded to fructose, suggesting that  
101 AmGr3 is indeed a fructose specific receptor (Fig. 2A and B; cf., [6]).

102 Stepwise increases in fructose concentrations resulted in a gradual rise in AmGr3-mediated currents at  
103 a membrane potential of -80 mV (Fig. 2C). When the steady-state currents, recorded in presence of  
104 rising extracellular fructose concentrations (3 up to 500 mM), were plotted as a function of the fructose  
105 concentration, AmGr3 currents increased upon membrane hyperpolarization and started to saturate  
106 between 300 and 500 mM fructose (Fig. 2D). A Hill function sufficiently described the individual fructose  
107 saturation curves at the given membrane potentials between -60 and -140 mV (Fig. 2D). The apparent  
108 affinity constant  $EC_{50}$  of AmGr3 was 210 mM at -100 mV. Plotting the calculated  $EC_{50}$  values as a

109 function of the membrane potential (Fig. 2E), it becomes apparent that hyperpolarizing voltages  
110 increased the apparent affinity of AmGr3 from  $325 \pm 60.4$  mM at -60 mV to  $170 \pm 7.8$  mM at -140 mV.  
111 Thus, our data show that AmGr3 is indeed a highly selective fructose receptor when expressed in  
112 *Xenopus* oocytes, leading to the question whether a nonsense mutation of this gene in live honeybees  
113 could affect their behavioural response to fructose.

#### 114 **CRISPR/Cas9 confirms AmGr3 as a specific fructose receptor in live honeybees**

115 We used CRISPR/Cas9 to introduce indels (insertions or deletions) which are not a multiple of three,  
116 leading to non-functional proteins of AmGr3 [18] (for sgRNA target-site and the location of the introduced  
117 frame shift in relation to the entire ORF, exons and introns of *AmGr3*, see Fig. 3). Two replicate  
118 experiments were performed, the second with a reduced sample size due to the extreme hot and dry  
119 summer 2018 (honeybee queens adapt their egg laying performance to the nectar flow and robustness  
120 during *in-vitro* rearing decreases with low humidity). Around 80 % of all eggs injected tolerated the  
121 injection. The treatment showed a 9.6 % hatching rate (13.9 % in replicate B). Between 53.3 and 69.9  
122 % of the control bees hatched into larvae (Tab. 1). The survival to adult emergence varied from day to  
123 day (59-86 %), likely due to the manual transferring steps (after hatching on food, before pupation on  
124 filter paper, not shown in the table). All one-week old adult bees were tested for their responses to  
125 fructose and sucrose. Only double nonsense (ns/ns) mutants and wildtypes (wt/wt) were included in the  
126 evaluation.

#### 127 **Table 1: Survival and hatching numbers and rates of the sgRNA and Cas9 injected and control** 128 **honeybee eggs or eggs with no injection under artificial rearing conditions.**

129 The 24h rate shows the percentage of eggs that tolerated the injection and were still intact after 24h.  
130 The hatching rate shows the percentage of larvae that hatched from the surviving eggs. The frequencies  
131 of 24h survival differs not when injected with sgRNA6 and Cas9 nuclease or water only (% 24h survival;  
132 replicate A: n.s.,  $p=0.7970$ ; replicate B: n.s.,  $p=0.0895$ ; Fisher's exact test). The survival of microinjected  
133 eggs of 24h is statistically different from eggs, that were not injected (% 24h survival; total: \*\*\*,  $p<0.0001$ ,  
134 Chi-Square-test). The hatching rate after three days decreases statistically when injected with water (%  
135 hatched; replicate A: \*\*\*,  $p<0.0001$ ; replicate B: \*,  $p=0.0126$ ; Fisher's exact test) and even lower when  
136 injected with sgRNA and Cas9 (% hatched; total: \*\*\*,  $p<0.0001$ ; Chi-Square test).

137 -----

|                         | replicate A |           | replicate B |           | total   |           |
|-------------------------|-------------|-----------|-------------|-----------|---------|-----------|
| treatment:              | # 24h       | # hatched | # 24h       | # hatched | # 24h   | # hatched |
| sgRNA and Cas9 injected | 1,436       | 200       | 1,116       | 107       | 2,552   | 307       |
| water injected          | 90          | 48        | 94          | 65        | 184     | 113       |
| no injection            | -           | -         | -           | -         | 251     | 183       |
| treatment:              | % 24h       | % hatched | % 24h       | % hatched | % 24h   | % hatched |
| sgRNA and Cas9 injected | 82.0        | 13.9*     | 78.3        | 9.6*      | 80.3    | 12.0**    |
| water injected          | 83.3        | 53.3      | 85.5        | 69.1      | 84.4    | 61.4*     |
| no injection            | -           | -         | -           | -         | 96.9*** | 72.9      |

138

139 Double nonsense mutations of the putative fructose receptor *AmGr3* were not lethal during larval  
140 development and the first week of adult life. This indicates that *AmGr3* is not essential for life-preserving  
141 behaviours such as food intake. To pre-screen the effectiveness of our treatment, we performed a  
142 fluorescence length analysis (FLA) based on capillary gel electrophoresis with HEX-labelled PCR  
143 products of the bees. With FLA we detected 36.0 % double-nonsense mutants in the treatment group  
144 (49.1 % in replicate B) and 91.7 % wild types (8.3 % still with one wt and one ns allele) in the control  
145 group (100 % in replicate B). We subsequently sequenced the respective amplicons of all primal  
146 genotyped mutants (ns/ns) and wild types (wt/wt) using next generation sequencing (NGS). Our results  
147 include all individuals with assured wildtype or mutant genotype via deep sequencing of the target  
148 amplicons (NGS proofed 85 samples (86.7 %) of the FLA pre-screened genotypes). All other genotypes  
149 (allele combinations of wt, ns and if (in-frame) were disregarded, since a clear statement about the  
150 presence and functionality of their *AmGr3* proteins and the measured behaviour is not possible.

151 In both replicates double mutants (ns/ns in fructose receptor gene *AmGr3*) displayed a significantly  
152 reduced responsiveness to fructose, unlike wildtypes (wt/wt) (Fig. 4, statistics also in Tab. 2) when tested  
153 at their antennae with rising sugar concentration [19]. Responses to sucrose, in contrast, were  
154 unaffected in both groups (Fig. 4, statistics also in Tab. 2).

155 **Table 2: Statistical values of logistic regression for Fig. 4 displaying that wildtype (wt/wt) and**  
156 ***AmGr3* mutant bees (ns/ns, double nonsense) differ statistically in their response to fructose but**  
157 **not to sucrose.**

158 Logistic regression was performed with the factor genotype for comparing the sugar curves (fructose  
159 OR sucrose) of both treatment groups (ns/ns vs. wt/wt). Mutant bees show a reduced fructose  
160 responsiveness but both groups do not differ in their sucrose response. For graphical display see  
161 Fig. 4.

162 -----

| compare sugar response curves (wt/wt vs. ns/ns of fructose OR sucrose) – logarithmic regression |                 |       |                 |     |                         |       |                |                        |       |                |
|-------------------------------------------------------------------------------------------------|-----------------|-------|-----------------|-----|-------------------------|-------|----------------|------------------------|-------|----------------|
| see Fig. 4                                                                                      | test groups (N) |       | log. Regression |     | fructose responsiveness |       |                | sucrose responsiveness |       |                |
|                                                                                                 | wt/wt           | ns/ns | df              | N   | Sign.                   | P     | X <sup>2</sup> | Sign.                  | p     | X <sup>2</sup> |
| replicate A                                                                                     | 26              | 31    | 1               | 399 | **                      | 0.005 | 8.026          | n.s.                   | 0.502 | 0.451          |
| replicate B                                                                                     | 10              | 12    | 1               | 154 | *                       | 0.022 | 5.265          | n.s.                   | 0.446 | 0.504          |

163 -----

## 164 Discussion

165 Although honeybees rely on feeding nectar, their genome only encodes for a small set of gustatory  
166 receptors. The behavioural repertoire linked to a limited number of sugar resources [20] [21] [19] [22]  
167 (for review see [23]) and the low number of taste receptors predestine the honeybee as an interesting  
168 organism to investigate the mechanisms of taste perception. Of the ten putative honeybee taste  
169 receptors, AmGr1 (AmGr2 as its possible co-receptor) was characterized as a sugar receptor for various  
170 ligands [5] while AmGr3 is regarded as a conserved ortholog of the fructose receptor of flies and moths  
171 [24] [11] [6].

172 Here we reconstituted the responses of AmGr3 to various sugars in the heterologous expression system  
173 of *Xenopus* oocytes. Two-electrode voltageclamp studies revealed a fructose-specific nonselective  
174 cation current conductance in AmGr3-expressing oocytes [6]. Although genetic studies using *Drosophila*  
175 *melanogaster* suggest that co-expression of multiple Grs is necessary for sugar perception [25] [26],  
176 AmGr3 did not require the co-expression of other Gr subunits to respond to fructose in oocytes, just like  
177 BmGr9 and DmGr43a [11]. The broad unspecific cation conductance we found is well in line with the  
178 studies of the AmGr3 ortholog from silkworm (*Bombyx mori* Gr9, BmGr9; [11]). Sato et al. (2011)  
179 demonstrated that BmGr9 constitutes a ligand-gated non-selective cation channel [11]. Just like BmGr9,  
180 AmGr3 conducted all monovalent cations tested (Fig. 1D). Very recently, a Cryo-EM-derived three-  
181 dimensional structure of the olfactory receptor Orco (Odorant receptor co-receptor) from the parasitic  
182 fig wasp *Apocrypta bakeri* was resolved at 3.5 Å resolution [27]. The 3D structure shows that the

183 functional receptor consists of four monomers symmetrically arranged around a central ion-conducting  
184 pore. Since Ors and Grs share the same gene structure, a predicted topology with seven  
185 transmembrane domains and a conserved motif in TM7 [28], it is tempting to speculate that functional  
186 Grs consist of four subunits, too. Whether AmGr3 assembles to heterotetrametric receptors with other  
187 members of the honeybee Gr-family and how this might influence the ligand specificity of the receptors  
188 remains to be shown. In future, the 3D structure of AbOrco will guide structure-function research not  
189 only of Ors but also of the related Gr family members.

190 Interestingly, fructose-induced cation currents across AmGr3 appeared activated by hyperpolarisation  
191 and thus inward rectifying (Fig. 1C; cf. [11]). Moreover, AmGr3 showed a time-dependent activation  
192 kinetics at hyperpolarized membrane potentials (Fig. 1B) and voltage-dependent  $EC_{50}$  values for  
193 fructose (Fig. 2D and E). These voltage-dependent electrical characteristics of AmGr3 require the  
194 presence of a voltage sensor domain/sidechains that sense the electrical field across the membrane.

195 However, the predicted topology of Grs does not contain a voltage sensor domain like the well-described  
196 Shaker-type voltage-gated potassium channels [29]. In 2016, Barchad-Avitzur et al. showed that the  
197 agonist binding affinity of the GPCR M2 muscarinic acetylcholine receptor (M2R) is modulated by  
198 voltage, just like the  $EC_{50}$  values of AmGr3 (Fig. 2E) [30]. Using biophysical techniques in combination  
199 with site-directed mutagenesis, the authors identified a non-canonical tyrosine-based voltage sensor  
200 that appeared crucial for the voltage dependence of agonist binding to the M2R receptor. Whether the  
201 voltage dependence of AmGr3 is also based on tyrosine residues within the electrical field of the  
202 membrane and whether the voltage dependence of the fructose receptor plays a crucial physiological  
203 function for the perception of sugar concentrations honeybees remains to be shown.

204 However, it is important to verify the heterologous expression in the original organism to define the  
205 function of a receptor. In the fruit fly *Drosophila melanogaster*, this is often done via knock out or knock  
206 in mutants. In honeybees, there are no transposons available and RNAi works to a limited extend in  
207 nerve tissue, which makes the new CRIPR/Cas9 technique a very promising method for such scientific  
208 questions. Our study is the first to demonstrate that CRISPR/Cas9 is a successful method to investigate  
209 the function of taste receptors in adult honeybees on a behavioural level. Our results show that AmGr3  
210 is a specialized fructose receptor in the honeybee, from both the biophysical characterization in oocytes  
211 and the behavioural perspective tested in honeybees. Healthy honeybees recognize both sucrose and  
212 fructose and respond more readily to increasing concentrations [31]. In our experiment, double  
213 nonsense mutations of the AmGr3 receptor led to a strong inhibition of responses to fructose, while



214 responses to sucrose remained unaffected (Fig. 4, statistics in Tab. 2). Intriguingly, some bees with  
215 double nonsense mutations still responded to fructose. We cannot exclude the possibility that the sugar  
216 receptor AmGr1 and its co-receptor AmGr2 perceive fructose in a reduced manner when co-expressed  
217 in the same gustatory neuron (for sugar taste in *Drosophila melanogaster* a co-expression of multiple  
218 Grs is assumed to be necessary [25] [26]), although these receptors normally do not respond to fructose.  
219 Furthermore, other receptors in the antennae may react to water, the tactile stimuli or the osmolarity of  
220 the testing solution and thus generate the baseline measured for fructose. Nevertheless, AmGr1 and  
221 AmGr2 did not show any reaction towards fructose when tested in *Xenopus* oocytes [5]. Alternatively,  
222 one or several of the uncharacterized honeybee gustatory receptors might be able to perceive fructose,  
223 possibly through perceiving the molarity of liquids *per se*. In addition, fructose might be structurally  
224 similar to ligands of other gustatory receptors. Further characterization and investigation of the other  
225 taste receptors of the honeybee will bring clarity to these questions in the future.

## 226 **Conclusion**

227 Our experiments demonstrate that CRISPR/Cas9 is an efficient tool to characterize taste receptors and  
228 other behaviourally relevant proteins in the honeybee. With the advent of this genetic tool, the honeybee  
229 has now a high potential for genetic manipulation. Taken together with the rich behavioural repertoire of  
230 this insect and its unique behavioural characteristics like division of labour, learning ability and dance  
231 language [1], this makes the honeybee an ideal model organism for studying gene function in a live  
232 insect. Furthermore, our data demonstrate that the AmGr3 receptor is not essential for larval  
233 development and that it is a specific fructose receptor in honeybee workers.

## 234 **Methods**

235 To characterize the putative fructose receptor from *Apis mellifera*, we cloned the respective cDNA and  
236 expressed AmGr3 heterologously in *Xenopus laevis* oocytes. To elucidate the sugar perception and  
237 cation transport characteristics of AmGr3, its functional analysis was performed using the two-electrode  
238 voltage-clamp technique (TEVC). The electrical characteristics of AmGr3 were studied with respect to  
239 its sugar specificity, fructose affinity, cation selectivity and voltage dependency.

240 Confirming its function as a fructose receptor *in vivo* we used CRISPR/Cas9 in honeybee eggs [17] [16].  
241 Mutated honeybees were raised in the laboratory [32]. At one-week of age, these animals were tested

242 for their response to fructose and sucrose [21] [19]. The success of the mutation was controlled by  
243 fluorescence length analysis (FLA [33]) a next generation sequencing (NGS) [34] [35].

#### 244 ***Xenopus* oocyte preparation**

245 Investigations on AmGr3 were performed in oocytes of the African clawed frog *Xenopus laevis*.  
246 Permission for keeping *Xenopus* exists at the Julius-von-Sachs Institute and is registered at the  
247 government of Lower Franconia (reference number 70/14 and 55.2-2532-2-1035). Mature female  
248 *Xenopus laevis* frogs (healthy, non-immunized and not involved in any previous procedures) were kept  
249 at 20 °C at a 12/12 h day/night cycle in dark grey 96 l tanks (5 frogs/tank). Frogs were fed twice a week  
250 with floating trout food (Fisch-FitMast 45/7 2 mm, Interquell GmbH, Wehringen, Germany). Tanks are  
251 equipped with 30 cm long PVC pipes with a diameter of around 10 cm. These pipes are used as hiding  
252 places for the frogs. The water is continuously circulated and filtered by a small aquarium pump. For  
253 oocyte isolation, mature female *X. laevis* frogs were anesthetized by immersion in water containing 0.1  
254 % 3-aminobenzoic acid ethylester. Following partial ovariectomy, oocytes were treated with collagenase  
255 I in Ca<sup>2+</sup>-free ND96 buffer (10 mM HEPES pH 7.4, 96 mM NaCl, 2 mM KCl, 1 mM MgCl<sub>2</sub>) for 1 to 1.5  
256 h. Subsequently, oocytes were washed with Ca<sup>2+</sup>-free ND96 buffer and kept at 16°C in ND96 solution  
257 (10 mM HEPESpH7.4, 96 mM NaCl, 2 mM KCl, 1 mM MgCl<sub>2</sub>, 1 mM CaCl<sub>2</sub>) containing 50 mg/l  
258 gentamycin. For electrophysiological experiments 10 ng of AmGr3 cRNA was injected into each stage  
259 V or VI oocyte. Oocytes were incubated for 2 to 3 days at 16 °C in ND96 solution containing gentamycin.

#### 260 **RNA extraction and cDNA synthesis**

261 For RNA extraction, frozen honeybee antennae, mouthparts and tarsi were broken up in 750 µl TriFast  
262 (peqGOLD, VWR, Radnor, USA) in a 2 ml Eppendorf (Hamburg, Germany) tube using Stainless Steel  
263 Beads (5 mm) and the TissueLyzer (QIAGEN, Venlo, Netherlands). After an incubation time of 5 min,  
264 200 µl chloroform were added, mixed, centrifuged and the aqueous phase was applied to a PerfectBind  
265 RNA Colum of the Total RNA Kit (peqGOLD, VWR, Radnor, USA). Further extraction of total RNA was  
266 performed according to the kits protocol. RNA was precipitated with 3 M sodium acetate, washed with  
267 ethanol, dried and the pellet was resolved to adjust the concentration. Synthesis of cDNA was carried  
268 out with the AccuScript Hi-Fi cDNA Synthesis Kit (Agilent Technologies, Santa Clara, USA) using  
269 Oligo(dT) primer (18mers) according to the manufactures instructions and required concentrations. RNA  
270 was digested enzymatically with RNase H (NEB, Ipswich, USA) following the protocol. According to the

271 instructions, a large scale Phusion PCR (NEB, Ipswich, USA) was performed using a forward (5'-  
272 GAATTGTCTCGTTCGCAAATAC-3') and a reverse primer (5'-CCGCTATTTACGAAAATTGG- 3')  
273 covering the predicted ORF (open reading frame) of the *AmGr3* gene (NCBI: XM\_016913387.1). The  
274 PCR product was applied and run on a 1 % (w/v) agarose gel. The appropriate band (1595 bp) was  
275 excised and purified as recommended by the Wizard SV Gel and PCR Clean-Up System (Promega,  
276 Fitchburg, USA). The blunt end PCR product was A-tailed with a 20 min incubation step at 72 °C by  
277 adding 0.2 mM dATP, taq polymerase and its required buffer (NEB, Ipswich, USA).

## 278 **Cloning and cRNA synthesis**

279 Via T/A ligation the fragment was inserted in the pGEM-T vector following the manufactures  
280 recommendations (Promega, Fitchburg, USA). Competent *Escherichia coli* cells (*E. coli* JM109;  
281 Promega, Fitchburg, USA) were incubated with the ligation mixture on ice for 30 min and then  
282 transformed by a 45 sec heat shock at 42 °C. After cooling on ice, the cells could regenerate on the  
283 shaker (300 rpm) at 37 °C for 45 min in 500 µl LB medium (Carl Roth, Karlsruhe, Germany). They were  
284 subsequently plated on agar plates (LB agar; Carl Roth, Karlsruhe, Germany) containing Carbenicillin  
285 (100µg/ml; Carl Roth, Karlsruhe, Germany) and IPTG (1 M, 2.5 µl per plate; Carl Roth, Karlsruhe,  
286 Germany) and X-Gal (240 mM, diluted in Dimethylformamide, 37.5 µl per plate; Carl Roth, Karlsruhe,  
287 Germany) and could grow over night at 37 °C. Using blue-white selection, clones were picked, cultivated  
288 in a liquid overnight culture (LB and 100 µg/ml Carbenicillin; Carl Roth, Karlsruhe, Germany), pelleted  
289 and purified by the Plasmid Miniprep Kit I (peqGOLD, VWR, Radnor, USA). Inserts of the isolated  
290 plasmids were verified by sequencing. The complementary DNA (cDNA) of *AmGr3* was then sub-cloned  
291 into oocyte expression vector pNBlu (based on pGEM vectors) by an advanced uracil-excision-based  
292 cloning technique using PfuX7 polymerase, as described by Nour-Eldin et al. (2006) and Nørholm (2010)  
293 [36] [37]. All constructs were verified by sequencing. For functional analysis, complementary RNA  
294 (cRNA) was prepared with the AmpliCap-Max T7 High Yield Message Maker Kit (Cellscript, Madison,  
295 WI, USA) according to the manufacturer's specifications.

## 296 **Oocyte recordings**

297 Solutions: In two-electrode voltage-clamp studies, oocytes were perfused with Tris/Mes-based buffers.  
298 The standard solutions contained 30 mM NaCl, 10 mM Tris/Mes (pH 7.4), 1 mM CaCl<sub>2</sub>, 1 mM MgCl<sub>2</sub>,  
299 and either 160 mM D-sorbitol (control solution) or 160 mM fructose. Solutions for cation selectivity  
300 measurements based on the standard solutions where NaCl was replaced by either 30 mM LiCl, KCl,

301 RbCl or CsCl. For sugar specificity measurements, D-Sorbitol was exchanged by either 160 mM of  
302 fructose, glucose, sucrose, mannose, galactose, maltose, arabinose, raffinose, trehalose or melezitose.  
303 Osmolarity was adjusted to 220 mOsmol/L with D-sorbitol. For the determination of the fructose affinity  
304 of AmGr3, the fructose concentration in the standard solution varied between 0 and 500 mM. To balance  
305 the osmolarity, we compensated changes in the fructose concentration with D-sorbitol. Due to the high  
306 sugar concentration during the fructose dose-response measurements, the osmolarity was around 560  
307 mOsmol/L, which was tolerated by the oocytes.

308 Electrical recordings and data analysis: For steady-state current ( $I_{ss}$ ) recordings with AmGr3 expressing  
309 oocytes, the standard voltage protocol was as follows: Starting from a holding potential ( $V_H$ ) of 0 mV,  
310 single 200 ms voltage pulses were applied from +40 to -150 mV in 20 mV decrements, unless otherwise  
311 stated in the figure legend. Fructose-induced currents were derived by subtracting the currents in the  
312 absence of fructose from the currents in its presence. For the calculation of the relative cation  
313 permeability of AmGr3, reversal potentials ( $V_{rev}$ ) were determined with either 30 mM KCl, LiCl, NaCl,  
314 RbCl or CsCl in the presence of 160 mM fructose. The relative permeability was calculated using the

315 following equation [38]:  $\frac{P_X}{P_K} = \frac{[K^+]_o}{[X^+]_o} e^{\frac{(E_X - E_K)F}{RT}}$ , where  $[K^+]_o$  is the external potassium concentration and  
316  $[X^+]_o$  is the external concentration of the test cation.  $E_K$  is the reversal potential with potassium and  $E_X$   
317 is the reversal potential for the external test cation.  $F$  and  $R$  are the Faraday and gas constants,  
318 respectively, and  $T$  is the absolute temperature. For the calculation of  $EC_{50}$  values, the fructose dose-  
319 response curves at different membrane potentials were fitted with a hill equation:  $\theta = I_{base} +$   
320  $(I_{max} - I_{base}) / \left\{ 1 + \left[ \frac{EC_{50}}{x} \right]^{n_H} \right\}$ , where  $I_{base}$  is the current in the absence of fructose,  $I_{max}$  the current in the  
321 presence of saturating fructose concentrations,  $EC_{50}$  the ligand concentration where the half maximal  
322 activity of AmGr3 is reached,  $x$  is the ligand concentration and  $n_H$  is the Hill-coefficient.

### 323 **Preparation of sgRNA**

324 Appropriate sites for sgRNAs (single guide RNA) were found in the first exons of the ORF (open reading  
325 frame) of the putative fructose receptor *AmGr3* in the genome of *Apis mellifera*. Using benchling  
326 (<https://benchling.com>, San Francisco, USA) we defined the target specific crRNA to be 20bp long, next  
327 to an NGG pam site and to start with a guanine base (for position within the gene also see Fig. 3). A  
328 sequence with a minimal on-target score of 50 % and an off-target score of at least 97 % were chosen.  
329 The secondary structure of the whole sgRNA was tested with the Vienna sgRNA fold program

330 (<http://rna.tbi.univie.ac.at/cgi-bin/RNAWebSuite/RNAfold.cgi>, University of Wien, Austria) to assure that  
331 its stable part (tracrRNA) folds into the interaction structure for the Cas9 enzyme and the 20 bp of the  
332 variable part (crRNA) is still freely accessible and can thus bind the genomic target. Two primers with  
333 overlapping sequences were designed. The forward primer was containing a T7 promoter and the  
334 certain crRNA sequence (5'-GAAATTAATACGACTCACTATA-**GCAACTTGTAGTGATGTGCT-**  
335 **GTTTTAGAGCTAGAAATAGC-3'**), the reverse primer was containing the tracrRNA sequence (5'-  
336 AAAAGCACCGACTCGGTGCCACTTTTTCAAGTTGATAACGGACTAGCCTTATTTAACTT-  
337 **GCTATTTCTAGCTCTAAAAC-3'**). Both were processed by an overlapping Phusion PCR (NEB,  
338 Ipswich, USA) and purified with Monarch PCR & DNA Cleanup Kit (5 µg) (NEB, Ipswich, USA), checked  
339 on an 1 % (w/v) agarose gel and quantified (NanoDrop BioPhotometer plus; Eppendorf, Hamburg,  
340 Germany). The PCR product was the template for the sgRNA synthesis according to the protocol of the  
341 RiboMAX Large Scale RNA Production Systems with T7 RNA polymerase (Promega, Fitchburg, USA).  
342 After the kits DNase digestion, sgRNA was purified with MEGAclean Transcription Clean-Up Kit  
343 (Invitrogen, Carlsbad, USA), checked on an agarose gel and quantified (NanoDrop BioPhotometer plus;  
344 Eppendorf, Hamburg, Germany). The sgRNA was aliquoted and frozen in portions. Initially, we produced  
345 three different sgRNAs and tested them in different concentrations. In this preliminary experiment (data  
346 not shown), we defined the hatching and mutation rates for each sgRNA and their best ratio with Cas9  
347 enzyme. During the experiment a fresh aliquot with 46 ng/µl sgRNA and 3.13 µM commercial Cas9  
348 enzyme (Cas9 Nuclease, *S. pyogenes*, 20 µM; NEB, Ipswich, USA) was used for each day and stored  
349 on ice.

### 350 **Honeybee egg harvest**

351 Nine hives with related and naturally inseminated queens of *Apis mellifera carnica* were kept at the bee  
352 station of the Julius-Maximilians-University of Würzburg in July and August 2018. Bees were allowed to  
353 forage freely. In order to stimulate the oviposition of the queen, the colonies were fed with ApiInvert or  
354 ApiFonda (Südzucker, Mannheim, Germany) during bad weather or insufficient floral nectar flow. For  
355 egg harvest the queens were locked in the JENTER system (Karl-Heinz Jenter, Frickenhausen,  
356 Germany) the evening before. As a result, they were forced to lay their eggs through a comb-like cell  
357 grid and onto removable JENTER plug-in cells. All plug-in cells were placed on prefabricated plates so  
358 that they could be easily exchanged at once. The queens were left in the system for three days and the  
359 overnight eggs were discarded. For injection, eggs were harvested every 1.5 – 2 h, starting in the

360 morning of each day. The sum of the injection time and the time since the last harvest was set for 3 h  
361 each round. Thus, the eggs were not older than 3 hours and should not have gone through any maturity  
362 division when injected. For the transport of the eggs we used an isolated transport box with preheated  
363 packs (35 °C, kept in the climate chamber).

#### 364 **Microinjection of eggs**

365 The eggs were processed and injected in a climate chamber maintained at constant 35 °C with no  
366 humidity regulation. For this purpose, the egg-containing plug-in cells were removed from the plates and  
367 fixed vertically on petri dishes (VWR) with plastiline (Pelikan Schindellegi, Switzerland). Thus, the tops  
368 of the eggs were easily accessible on the outer ring, while the eggs were attached to the cell at their  
369 bottom. The injection area was surrounded by a box with a glass lid and a liquid reservoir to ensure  
370 humidity during the injection process. In this area, the rings could be rotated with one hand while the  
371 injection needle entered it through a small hole. The ICSI Glass Pipettes used (BioMedical Instruments,  
372 Zöllnitz, Germany) were controlled with the Singer Mk1 micromanipulator (SINGER instruments,  
373 Somerset, England) and inserted into the upper quarter of the eggs. For injection, the PLI-100A picolitre  
374 injector (Warner Instruments, Hamden, USA) with a footswitch was used and operated by the climate  
375 chamber's air system (max. 7 bar, with intermediate filter). Each egg was injected with 400 pl of either  
376 water or sgRNA6 with Cas9 (prepared as described above; injection time: 120 ms;  $P_{bal}$ : 5 kPa;  $P_{inje}$ : 60  
377 kPa). Thereafter, the rings with injected eggs were placed in plastic boxes with a sulphurous atmosphere  
378 (1ml of 16 % sulfuric acid per liter of volume, separated from the rings by a grid) to keep the puncture  
379 site sterile. One day after the injection, burst or dried eggs were removed. The 24 h mortality rate reflects  
380 the failure of the egg to develop due to injection, because it is approximately equal for eggs injected with  
381 water or sgRNA and Cas9 enzymes. A few hours before hatching the sulfuric acid was washed off well  
382 and replaced with water. Immediately after hatching, the larvae were removed carefully with a modified  
383 Chinese grafting tool. The hatching rate displays the tolerance of the sgRNA with Cas9 enzyme, since  
384 it is over 95 % when the eggs were injected with water only. In our experiment, we performed two  
385 replicates of injection weeks.

#### 386 **Artificial rearing of honeybees**

387 The freshly hatched honeybee larvae were carefully detached from the plug-in cells with a modified  
388 Chinese grafting tool dipped in larvae food. They were placed laterally in prepared Nicot-wells

389 (NICOTPLAST, Maisod, France) containing larval food. Care was taken not to contaminate the lateral  
390 breathing holes of the upper side. The food and rearing procedures are described in detail in Schmehl  
391 et al. (2016, [32]) with some deviations from the protocol). The Nicot-wells in which the larvae were  
392 placed were already filled with "larval food A and B". They were placed in 48-well NUNC plates  
393 (ThermoFisher, Massachusetts, USA) in which they lay on cotton wool slices soaked with 0,4 % MBC  
394 (methylbenzethoniumchlorid chloride, w/v) and glycerol (84.5 % and 15.5 %, v/v). The closed 48-well  
395 plates rested in a separate box in the incubator at 35°C for the duration of larval development. As  
396 described in Schmehl et al. (2016, [32]), the box contained a K<sub>2</sub>SO<sub>4</sub> buffer which adjusted the humidity  
397 to ~ 94 %. After the larvae consumed the food of all conducted feedings (for feeding ingredients and  
398 times see also [32]), they were transferred to sterile filter paper in a fresh 48-well plate. During pupation,  
399 the animals were left to develop in a ~ 75 % humidity, which was achieved by NaCl buffer. After hatching  
400 within the 48-well plates, the adult bees were individually marked with colored number plates (Opalith  
401 queenmarking plates) using super glue (UHU). After cutting of a wing for easier handling and safety  
402 reasons, they were placed in a cage with pollen and sugar water (20 % sucrose, 10 % fructose and 10  
403 % glucose, w/w/w/v). All bees of one replicate shared one cage, including the labelled control animals,  
404 and were kept in an incubator maintained at 28 °C.

#### 405 **Testing responsiveness to sucrose and fructose**

406 Bees were tested for their proboscis extension response (PER) to increasing concentrations of sucrose  
407 and fructose at one-week old. For this test, each bee was immobilized on ice, carefully mounted in brass  
408 tubes and fixed with adhesive tape [19]. At each test, both antennae were stimulated with a droplet of a  
409 certain sugar water concentration. Both sugars, alternatingly starting with fructose or sucrose, were  
410 tested. After a test with water, the test of a sugar solution was carried out with the following increasing  
411 concentrations 16 %, 20 %, 25 %, 32 %, 40 %, 50 % and 63 % (w/v) which corresponds to a logarithmic  
412 series of approximately 1.2; 1.3; 1.4; 1.5; 1.6; 1.7; 1.8. Contaminations occurring at the antennae were  
413 immediately removed and rinsed with water. It was already shown that sucrose responsiveness is not  
414 affected by the order of the concentrations tested [19]. The positive PER for each concentration was  
415 recorded individually for each sugar (sucrose or fructose) and each bee. To prevent intrinsic  
416 sensitization, there was an inter-trial interval of 2 min [19]. The sum of the responses to water and the  
417 ascending concentrations of the certain sugar displays the gustatory response score (GRS) of a bee for  
418 fructose or sucrose.

## 419 **Genotyping via fluorescence length analysis and next generation sequencing**

420 Directly after the behavioral test, the bees were individually immersed in liquid nitrogen and stored at -  
421 20 °C. Their heads were dissected, placed in 2ml Eppendorf (Hamburg, Germany) tubes and disrupted  
422 with a pre-cooled Stainless-Steel Beads (5 mm) in the TissueLyzer (QIAGEN, Venlo, Netherlands). The  
423 genomic DNA (gDNA) of each bee was relieved by 200 µl CTAB lysis buffer (1 % CTAB (*w/v*), 50 mM  
424 Tris pH8, 10 mM EDTA, 0.75 M NaCl) and 2 µl protein kinase K (NEB, Ipswich, USA) during 2 h at 60  
425 °C. It was isolated by phenol/chloroform/isoamyl alcohol (25:24:1, pH 7.5-8.0), washed with chloroform  
426 (250 µl) and precipitated with natrium acetate (3 M; 20µl) and ice-cold ethanol (100 %; 450 µl). After  
427 washing with 70 % ethanol, final centrifuging and drying, the pellets were resolved in nuclease-free  
428 water (100 µl each). With the obtained gDNA samples, a PCR was performed with a hex-labeled forward  
429 primer (5'-HEX- TCGTACTTGTATTACTACTTAGTGC-3') and a reverse primer (5'-  
430 AACAAAGTTGCAAATATTTCCAACGG-3'), both framing the sgRNA site. In 96-well quality PCR plates (for  
431 FLA, Kisker Biotech, Steinfurt, Germany) 1 µl of each PCR product was edited with Hi-Di Formamide (20 µl,  
432 ThermoFisher, Massachusetts, USA) and Gene Scan 500 ROX dye Size Standard (0.5 µl, ThermoFisher,  
433 Massachusetts, USA) and examined in a fluorescence length analysis via the HEX-label. The obtained  
434 peaks accurately display length deviations of only 1 bp from the wildtype (evaluated with PeakScanner2;  
435 ThermoFisher, Massachusetts, USA). To ensure that these shifted peaks represent mutations in the  
436 genomic DNA we performed next generation sequencing (NGS, performed with GENEWIZ, Leipzig,  
437 Germany) with all candidate samples. Samples were first indexed with two tags (5'-CTGTGATG-3' and  
438 5'-GCGCAATA-3') for multiplexing and amplified with adapter overhangs (complete sequences, forward:  
439 5'-ACACTCTTTCCCTACACGACGCTCTTCCGATCTCTGTGATGtgcgtactgtattactacttagtg-3' and  
440 reverse: 5'-ACACTCTTTCCCTACACGACGCTCTTCCGATCTGCGCAATAtgcgtactgtattactacttagtg-3')  
441 for a second multiplexing process to be performed at GENEWIZ directly before sequencing on a Illumina  
442 HiSeq 2500 (2x250bp, Rapid Run). We demultiplexed the samples by the barcoding using HMMer  
443 v3.2.1 [39]. Forward and reverse reads were merged and subsequently quality filtered (maxEE=1,  
444 minlen=100) using USEARCH v11 [40]. We then identified indel lengths and counted variants with an  
445 own perl script for each sample. Since each animal has two alleles, we classified each of them with "wt"  
446 (for wildtype) if in-frame indels were a multiple of 3 bps, leaving the open reading frame intact. Nonsense  
447 alleles were labeled with "ns", including open reading frame shifts and leading to non-functional proteins  
448 (see Fig. 3). Worker bees may be homozygous or heterozygous combining these possible configurations



449 (derived from two chromosomes). For the investigation of the behavior only homozygous wildtypes  
450 (wt/wt) and mutants (ns/ns) were analyzed.

#### 451 **Quantification and statistical analysis**

452 All electrophysiological experiments were performed at least twice (independent experiments with  
453 oocytes from different batches). Sample size, n, and statistical details (mean  $\pm$  standard error, SE or  
454 standard deviation, SD) are given in the figure legends for each experiment. For statistical analysis, the  
455 software Igor Pro 8 (waveMetrics, Inc., Lake Oswego, Oregon, USA) and Excel (Microsoft Corp.  
456 Redmond, Washington, USA) was used.

457 For structural prediction of the AmGr3 protein (Fig. 3) the sequence was modelled to the Cryo-EM  
458 structure of *Apocrypta bakeri* Orco (PDB 6c70A, [27]) using I-Tasser (University of Michigan, [41], [42])  
459 and compared with other predictions (PHYRE2, Imperial College London and TMHMM, DTU  
460 Bioinformatics Denmark).

461 The GraphPad Prism software (version 7.03; GraphPad Software, San Diego, USA) was used for  
462 analyzing survival and hatching. Fisher's exact tests were used to compare 24h survival and hatching  
463 of eggs in both replicates either injected with sgRNA and Cas9 or with water. Chi-Square tests was  
464 applied to compare these in total values additionally including not injected eggs. The fructose and  
465 sucrose gustatory response curves were analyzed with the IBM SPSS software (version 23.0.0.0; IBM,  
466 New York, USA) via logistic regression [factor genotype] and graphical displayed in Graph Pad Prism.

#### 467 **Supplementary information**

468 Additional files: **Xlsx-file 1:** suppl\_24h\_3d\_survival\_injection; **Xlsx-file 2:**  
469 suppl\_FLA\_vs\_NGS\_raw\_scripted\_reads, **Xlsx-file 3:** suppl\_PER\_data\_FRUC\_SUC; **Xlsx-file 4:**  
470 suppl\_portion\_wt\_ns\_FLA\_peaks; **pl-file 1:** suppl\_SCRIPT\_get\_indels.

#### 471 **Acknowledgments**

472 We thank Anne Huber and Sandra Reimlinger for biophysical analysis of AmGr3 in oocytes, Marianne  
473 Otte and Vivien Bauer for help and assistance in CRISPR/Cas9 related molecular work and injection  
474 procedure. We thank Markus Thamm for molecular lab expertise and Karin Möller for technical  
475 assistance. We thank Maria Scherrer, Lisa Rauscher, Lioba Hilsmann, Tabea Lammert, Daniel  
476 Rodriguez, Katharina Beer and Felix Schilcher for honeybee queen caging, egg collection, preparation

477 for injection and help with artificial rearing. We thank Martin Gabel, Gaby Läbisch and Dirk Ahrens for  
478 the beehive maintenance. This project was supported by a fund of the DFG to R.S. (SCHE 1573/8-1).

#### 479 **Author Contributions**

480 D.G., L.D., M.B., A.K. and R.S. designed research and wrote the paper. I. S.-D. devised experiments  
481 and contributed to manuscript revision. D.G. and F.L.R.F. performed biophysical characterization  
482 experiments and analysed the data. L.D. performed CRISPR/Cas9 experiments and data analysis. B.K.  
483 was involved in artificial rearing of honeybees. AK performed bioinformatics for genotyping.

#### 484 **Fundings**

485 This study was supported by the Deutsche Forschungsgemeinschaft through grant SCHE 1573/8-1 to  
486 R.S.

#### 487 **Availability of data and materials**

488 Correspondence and requests for materials not included in the supplementary information  
489 should be addressed to L.D. and M.B. for CRISPR/Cas9, to L.D. for *in vitro* rearing of larvae,  
490 to D.G. and F.L.R.F. for characterization and to A.K. for bioinformatics.

#### 491 **Ethics approval and consent to participate**

492 No ethics approval or consent to participate was required for this study.

#### 493 **Competing interests**

494 The authors declare that they have no competing interests.

#### 495 **Author details**

496 1 University of Würzburg, Behavioral Physiology and Sociobiology, Biocenter, Am Hubland,  
497 97074 Würzburg, Germany, 2 University of Würzburg, Julius-von-Sachs-Institute, Molecular  
498 Plant Physiology and Biophysics, Biocenter, Julius-von-Sachs-Platz 2, 97082 Würzburg,  
499 Germany, 3 University of Würzburg, Department of Bioinformatics, Biocenter, Am Hubland,  
500 97074 Würzburg, Germany, 4 University of Würzburg, Animal Ecology and Tropical Biology,

501 Biocenter, Am Hubland, 97074 Würzburg, Germany, 5 Heinrich-Heine-Universität Düsseldorf,  
502 Evolutionary Genetics, Universitätsstraße 1, 40225 Düsseldorf, Germany.

## 503 **References**

- [1] T. D. Seeley, *The wisdom of the hive: the social physiology of honey bee colonies*, Harvard University Press, 2009.
- [2] J. M. Graham, *The Hive and the Honeybee*, Hamilton, Illinois: Dadant & Sons, 1992.
- [3] M. Bertazzini and G. Forlani, "Intraspecific variability of floral nectar volume and composition in rapeseed (*Brassica napus* L. var. *oleifera*)," *Frontiers in plant science*, no. 7, p. 288, 2016.
- [4] Robertson, H. M. and Wanner, K. W., "The chemoreceptor superfamily in the honey bee, *Apis mellifera*: expansion of the odorant, but not gustatory, receptor family," *Genome research*, vol. 16, no. 11, pp. 1395-1403, 2006.
- [5] Jung, J. W., Park, K. W., Ahn, Y. J. and Kwon, H. W., "Functional characterization of sugar receptors in the western honeybee, *Apis mellifera*," *Journal of Asia-Pacific Entomology*, vol. 18, no. 1, pp. 19-26, 2015.
- [6] Takada, T., Sasaki, T., Sato, R., Kikuta, S. and Inoue, M. N., "Differential expression of a fructose receptor gene in honey bee workers according to age and behavioral role," *Archives of insect biochemistry and physiology*, vol. 97, no. 2, p. e21437, 2018.
- [7] S. S. Haupt, "Central gustatory projections and side-specificity of operant antennal muscle conditioning in the honeybee," *Journal of Comparative Physiology A*, vol. 193, no. 5, pp. 523-535, 2007.
- [8] Simcock, N. K., Wakeling, L. A., Ford, D. and Wright, G. A., "Effects of age and nutritional state on the expression of gustatory receptors in the honeybee (*Apis mellifera*)," *PloS one*, vol. 12, no. 4, p. e0175158, 2017.
- [9] D. A. Stanley, D. Gunning and J. C. Stout, "Pollinators and pollination of oilseed rape crops (*Brassica napus* L.) in Ireland: ecological and economic incentives for pollinator conservation," *Journal of Insect Conservation*, vol. 17, no. 6, pp. 1181-1189, 2013.
- [10] V. R. Chalcoff, M. A. Aizen and L. Galetto, "Nectar concentration and composition of 26 species from the temperate forest of South America," *Annals of botany*, vol. 97, no. 3, pp. 413-421, 2006.
- [11] Sato, K, Tanaka, K. and Touhara, K., "Sugar-regulated cation channel formed by an insect gustatory receptor," *Proceedings of the National Academy of Sciences*, vol. 108, no. 28, pp. 11680-11685, 2011.
- [12] Yoo, S. D., Cho, Y. H. and Sheen, J. , "Arabidopsis mesophyll protoplasts: a versatile cell system for transient gene expression analysis," *Nature protocols*, vol. 2, no. 7, p. 1565, 2007.

- [13] S. C. Lin, Y. Y. Chang and C. C. Chan, "Strategies for gene disruption in *Drosophila*," *Cell & bioscience*, vol. 4, no. 1, p. 63, 2014.
- [14] Bassett, A. R., Tibbit, C., Ponting, C. P. and Liu, J. L., "Highly efficient targeted mutagenesis of *Drosophila* with the CRISPR/Cas9 system," *Cell reports*, vol. 4, no. 1, pp. 220-228, 2013.
- [15] Basu, S., Aryan, A., Overcash, J.M., Samuel, G.H., Anderson, M.A., Dahlem, T.J., Myles, K.M. and Adelman, Z.N., "Silencing of end-joining repair for efficient site-specific gene insertion after TALEN/CRISPR mutagenesis in *Aedes aegypti*," *Proceedings of the National Academy of Sciences*, vol. 112, no. 13, pp. 4038-4043, 2015.
- [16] Kohno, H., Suenami, S., Takeuchi, H., Sasaki, T. and Kubo, T., "Production of Knockout Mutants by CRISPR/Cas9 in the European Honeybee, *Apis mellifera* L.," *Zoological science*, vol. 33, no. 5, pp. 505-513, 2016.
- [17] Roth, A., Vleurinck, C., Netschitailo, O., Bauer, V., Otte, M., Kaftanoglu, O., Page, R.E. and Beye, M., "A genetic switch for worker nutrition-mediated traits in honeybees," *PLoS biology*, vol. 17, no. 3, p. e3000171, 2019.
- [18] S. V. Prykhozhij, S. Steele, B. Razaghi and J. N. Berman, "A rapid and effective method for screening, sequencing and reporter verification of engineered frameshift mutations in zebrafish," *Disease models & mechanisms*, vol. 10, no. 6, pp. 811-822, 2017.
- [19] Scheiner, R., Abramson, C.I., Brodschneider, R., Crailsheim, K., Farina, W.M., Fuchs, S., Gruenewald, B., Hahshold, S., Karrer, M., Koeniger, G. and Koeniger, N., "Standard methods for behavioural studies of *Apis mellifera*," *Journal of Apicultural Research*, vol. 52, no. 4, pp. 1-58, 2013.
- [20] Scheiner, R., Page Jr, R. E. and Erber, J. , "The effects of genotype, foraging role, and sucrose responsiveness on the tactile learning performance of honey bees (*Apis mellifera* L.)," *Neurobiology of learning and memory*, vol. 76, no. 2, pp. 138-150, 2001.
- [21] Scheiner, R., Page, R. E. and Erber, J. , "Sucrose responsiveness and behavioral plasticity in honey bees (*Apis mellifera*)," *Apidologie*, vol. 35, no. 2, pp. 133-142, 2004.
- [22] Wright, G.A., Choudhary, A.F. and Bentley, M.A., "Reward quality influences the development of learned olfactory biases in honeybees," *Proceedings of the Royal Society B: Biological Sciences*, vol. 276, no. 1667, pp. 2597-2604, 2009.
- [23] de Brito Sanchez, G., Ortigao-Farias, J.R., Gauthier, M., Liu, F. and Giurfa, M., "Taste perception in honeybees: just a taste of honey?," *Arthropod-Plant Interactions*, vol. 1, no. 2, pp. 69-76, 2007.
- [24] Miyamoto, T., Slone, J., Song, X. and Amrein, H. , "A fructose receptor functions as a nutrient sensor in the *Drosophila* brain," *Cell*, vol. 151, no. 5, pp. 1113-1125, 2012.
- [25] Jiao, Y., Moon, S. J., Wang, X., Ren, Q. and Montell, C. , "Gr64f is required in combination with other gustatory receptors for sugar detection in *Drosophila*," *Current Biology*, vol. 18, no. 22, pp. 1797-1801, 2008.
- [26] Slone, J., Daniels, J. and Amrein, H., "Sugar receptors in *Drosophila*," *Current Biology*, vol. 17, no. 20, pp. 1809-1816, 2007.

- [27] Butterwick, J. A., del Marmol, J., Kim, K. H., Kahlson, M. A., Rogow, J. A., Walz, T. and Ruta, V., "Cryo-EM structure of the insect olfactory receptor Orco," *Nature*, vol. 560, no. 7719, p. 447, 2018.
- [28] Robertson, H. M. , "Molecular evolution of the major arthropod chemoreceptor gene families," *Annual review of entomology*, vol. 64, pp. 227-242, 2019.
- [29] F. Bezanilla, "The voltage-sensor structure in a voltage-gated channel," *Trends in biochemical sciences*, vol. 30, no. 4, pp. 166-168, 2005.
- [30] Barchad-Avitzur, O., Priest, M. F., Dekel, N., Bezanilla, F., Parnas, H. and Ben-Chaim, Y. , "A novel voltage sensor in the orthosteric binding site of the M2 muscarinic receptor," *Biophysical journal*, vol. 111, no. 7, pp. 1396-1408, 2016.
- [31] Değirmenci, L., Thamm, M. and Scheiner, R., "Responses to sugar and sugar receptor gene expression in different social roles of the honeybee (*Apis mellifera*)," *Journal of insect physiology*, vol. 106, pp. 65-70, 2018.
- [32] Schmehl, D. R., Tomé, H. V., Mortensen, A. N., Martins, G. F. and Ellis, J. D., "Protocol for the in vitro rearing of honey bee (*Apis mellifera* L.) workers," *ournal of Apicultural Research*, vol. 55, no. 2, pp. 113-129, 2016.
- [33] M. K. Ramlee, T. Yan, A. M. Cheung, C. T. Chuah and S. Li, "High-throughput genotyping of CRISPR/Cas9-mediated mutants using fluorescent PCR-capillary gel electrophoresis," *Scientific reports*, vol. 5, no. 1, pp. 1-13, 2015.
- [34] J. Shendure and H. Ji, "Next-generation DNA sequencing," *Nature biotechnology*, vol. 26, no. 10, p. 1135, 2008.
- [35] B. F. Vogel, V. Fussing, B. Ojeniyi, L. Gram and P. Ahrens, "High-resolution genotyping of *Listeria monocytogenes* by fluorescent amplified fragment length polymorphism analysis compared to pulsed-field gel electrophoresis, random amplified polymorphic DNA analysis, ribotyping, and PCR–restriction fragment length po," *Journal of food protection*, vol. 67, no. 8, pp. 1656-1665, 2004.
- [36] H. H. Nour-Eldin, B. G. Hansen, M. H. Nørholm, J. K. Jensen and B. A. Halkier, "Advancing uracil-excision based cloning towards an ideal technique for cloning PCR fragments," *Nucleic acids research*, vol. 34, no. 18, pp. e122-e122, 2006.
- [37] M. H. Nørholm, "A mutant Pfu DNA polymerase designed for advanced uracil-excision DNA engineering," *BMC biotechnology*, vol. 10, no. 1, p. 21, 2010.
- [38] D. Becker, I. Dreyer, S. T. E. F. A. N. HoTH, J. D. Reid, H. Busch, M. Lehnen, K. Palme and R. Hedrich, "Changes in voltage activation, Cs<sup>+</sup> sensitivity, and ion permeability in H5 mutants of the plant K<sup>+</sup> channel KAT1," *Proceedings of the National Academy of Sciences*, vol. 93, no. 15, pp. 8123-8128, 1996.
- [39] S. R. Eddy, "Eddy, Sean R. "Accelerated profile HMM searches," *PLoS computational biology*, vol. 10, no. 7, p. e1002195, 2011.
- [40] R. C. Edgar, "Search and clustering orders of magnitude faster than BLAST," *Bioinformatics*, vol. 19, no. 26, pp. 2460-2461, 2010.

- [41] J. Yang and Y. Zhang, "I-TASSER server: new development for protein structure and function predictions," *Nucleic acids research*, vol. 43, no. W1, pp. W174-W181, 2015.
- [42] C. Zhang, P. L. Freddolino and Y. Zhang, "COFACTOR: improved protein function prediction by combining structure, sequence and protein–protein interaction information," *Nucleic acids research*, vol. 45, no. W1, pp. W291-W299, 2017.
- [43] M. Jinek, K. Chylinski, I. Fonfara, M. Hauer, J. A. Doudna and E. Charpentier, "A programmable dual-RNA–guided DNA endonuclease in adaptive bacterial immunity," *science*, vol. 337, no. 6096, pp. 816-821, 2012.
- [44] J. M. Graham, "The Hive and the Honeybee, Dadant & Sons," *Hamilton, Illinois*, 1992.
- [45] M. Bertazzini and G. Forlani, "Intraspecific variability of floral nectar volume and composition in rapeseed (*Brassica napus* L. var. *oleifera*)," *Frontiers in plant science*, vol. 7, p. 288, 2016.

504

505

506

507 **Figures and Figure Captions**

508 **Figure 0**

509 **Graphical Abstract**

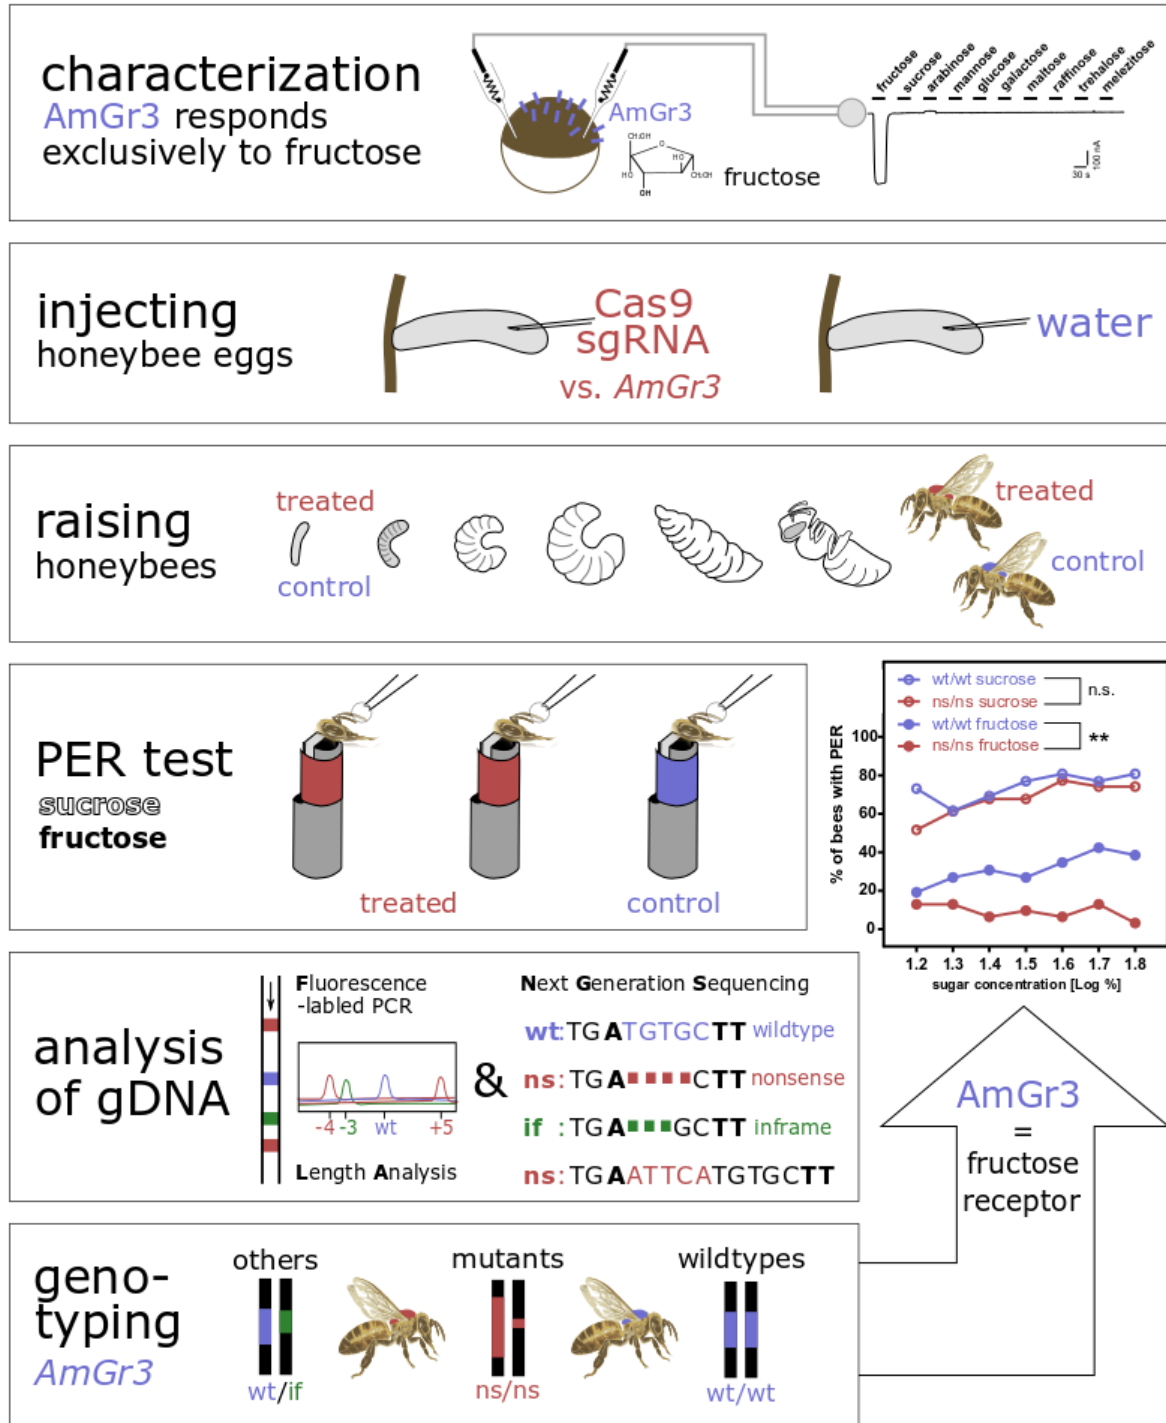

510

511

512 **Figure 1**

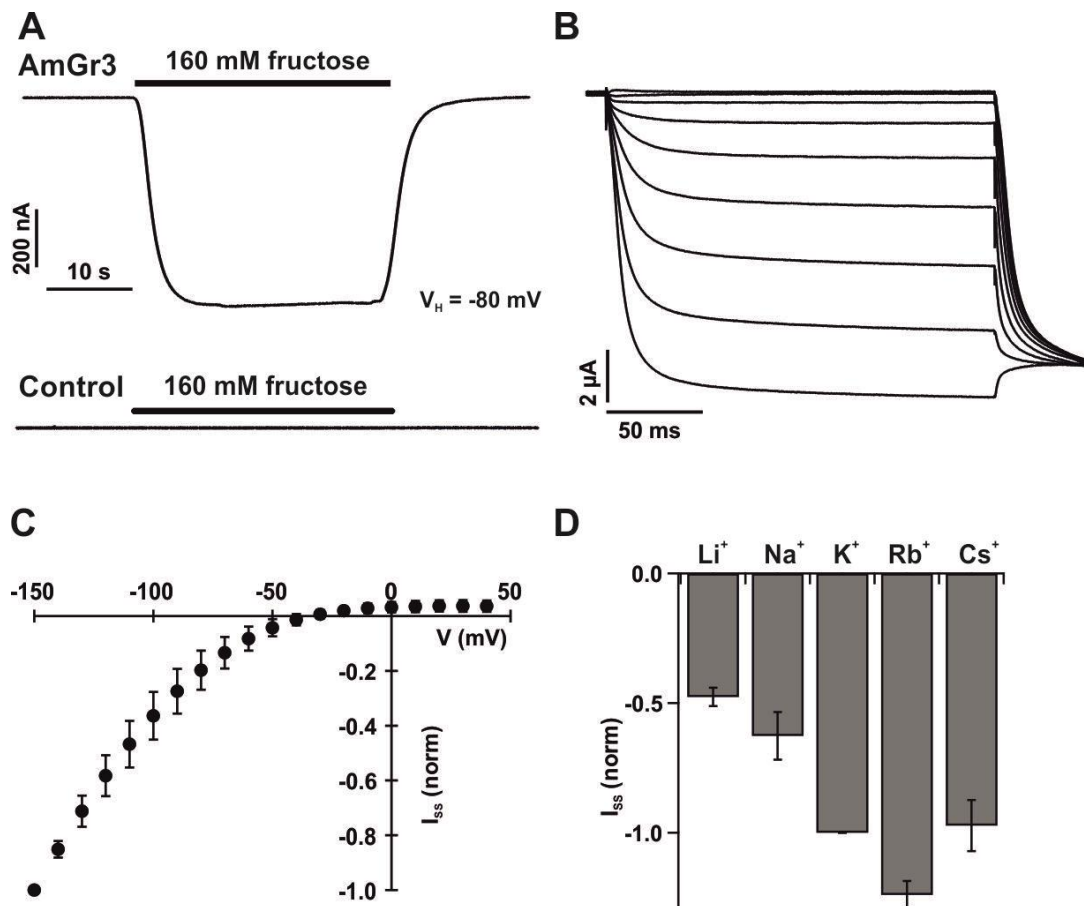

513

514 **Fig. 1: AmGr3 represents a hyperpolarisation activated fructose receptor.**

515 **A)** Representative whole oocyte currents recorded at -80 mV in response to perfusion with fructose in  
516 standard solution. Upper panel: AmGr3 expressing oocyte; Lower panel: non-injected control oocyte. **B)**  
517 Representative fructose-induced whole oocyte currents in response to a series of 200 ms test pulses  
518 ranging from +10 mV to -150 mV in 20 mV decrements. Each test pulse was followed by a constant  
519 voltage pulse to -140 mV. The holding potential was at 0 mV. Currents were recorded in standard  
520 solution containing 160 mM fructose. **C)** Fructose-induced steadystate currents ( $I_{ss}$ ) from AmGr3  
521 expressing oocytes were plotted as a function of the applied membrane potential. Fructose-induced  
522 currents were derived by subtracting the currents recorded in standard solution containing 160 mM  
523 sorbitol from the currents in standard solution containing 160 mM fructose ( $n = 3 \pm$  SD). **D)** Fructose-  
524 induced  $I_{ss}$  were recorded in the presence of 30 mM of different monovalent cations (as indicated) and  
525 160 mM fructose at a membrane potential of -140 mV. AmGr3 derived currents were normalized to the  
526 currents in K<sup>+</sup>-based media (mean of  $n = 5$  oocytes  $\pm$  SE).



527 **Figure 2**

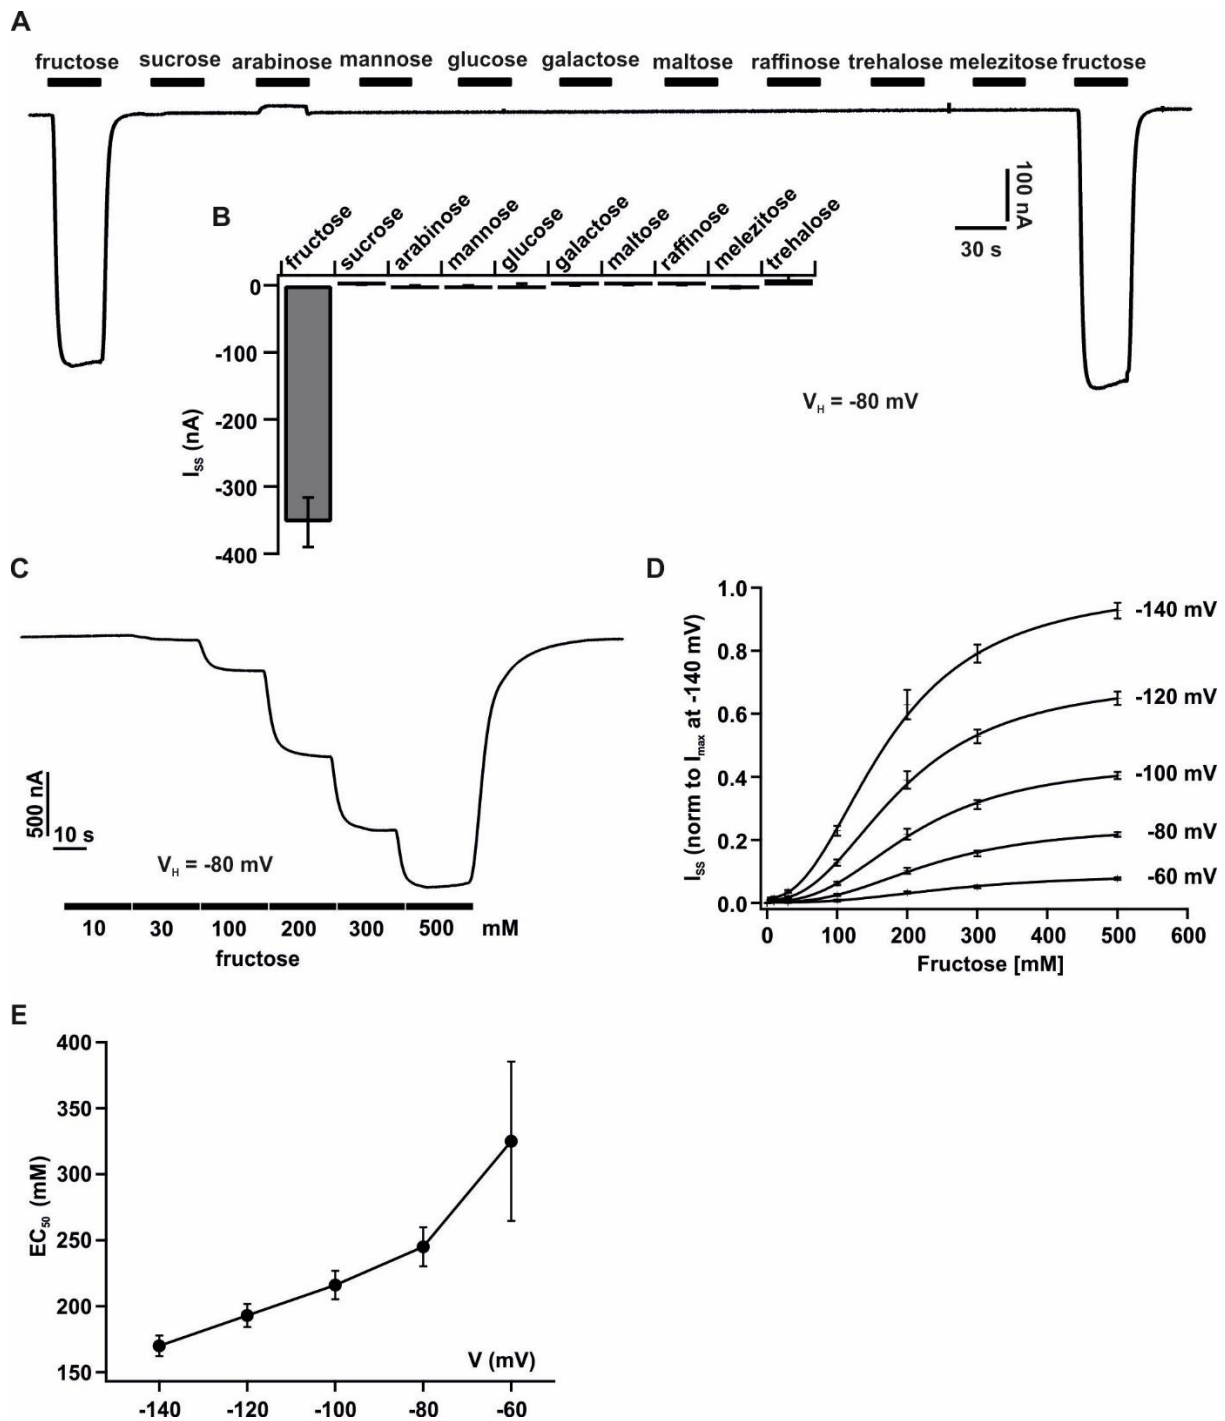

528

529 **Fig. 2: Fructose is the only sugar inducing AmGr3-derived currents.**

530 **A)** Representative whole oocyte currents from oocytes expressing AmGr3 were recorded at -80 mV in  
 531 response to perfusion with 160 mM of different mono-, di- and trisaccharides in standard solution.  
 532 Perfusion with test sugars are indicated by black bars. **B)** Statistical analysis of the sugar selectivity of  
 533 AmGr3 expressed in *Xenopus* oocytes. Steady state currents in the presence of the indicated sugars  
 534 were monitored at a membrane potential of -80 mV (mean of  $n = 9$  oocytes  $\pm$  SE). **C)** Whole oocyte

535 current recording from an AmGr3 expressing oocyte at a membrane potential of -80 mV. Successive  
536 elevation of the fructose concentration (black bars indicate the applied fructose concentration) in the  
537 standard solution gradually increased the AmGr3-mediated currents. **D)**  $I_{ss}$  from AmGr3 injected  
538 oocytes were recorded in presence of rising extracellular fructose concentrations and plotted as a  
539 function of the fructose concentration. A Hill function was fitted to the individual fructose saturation  
540 curves at the indicated membrane potentials (black solid line; mean of  $n = 11$  oocytes  $\pm$  SE). **E)** The  
541 apparent affinity constants  $EC_{50}$  derived from fits such as shown in D) were plotted as a function of the  
542 membrane potential (mean of  $n = 11$  oocytes  $\pm$  SE).

### 543 **Figure 3**

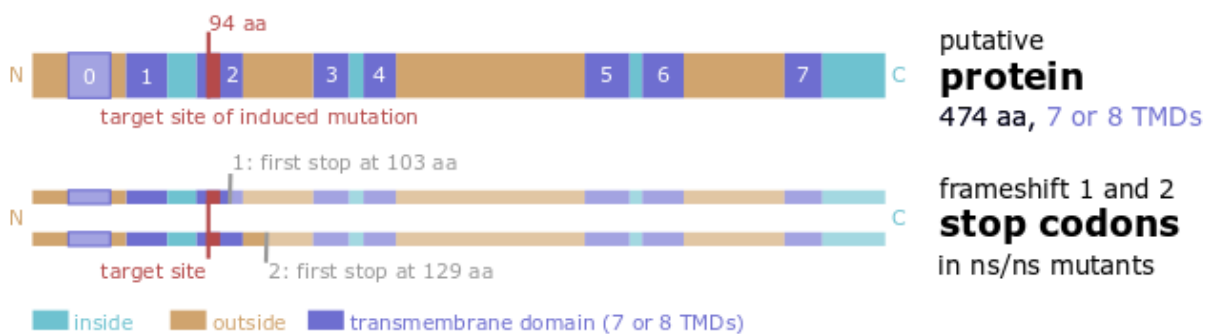

545 **Fig. 3: CRISPR/Cas9 induced nucleotide changes at the *AmGr3* gene target the second putative**  
546 **transmembrane domain and introduce double-nonsense mutations (ns/ns) at high frequency.**

547 The graph shows that the mRNA target-site for *AmGr3* (5'-gcaactgtagtgatgtgcttg-3') is placed within  
548 the putative second transmembrane domain (TMD) after the N-terminus. Folding predictions (I-  
549 TASSER, PHYRE-Protein and TMHMM) show different outcomes about a possible upstream TMD  
550 (TMD 0). The two possible frameshift mutations (not a multiple of three) driven from the sgRNA target-  
551 site introduce either a stop codon at position 103 aa or 129 aa (amino acids) of the deduced sequence  
552 and are followed by multiple stops. As a consequence, five TMDs of the AmGr3 proteins are lacking in  
553 double-nonsense (ns/ns) mutants so it is assumed not to function as a fructose receptor at all.

554

555 **Figure 4**

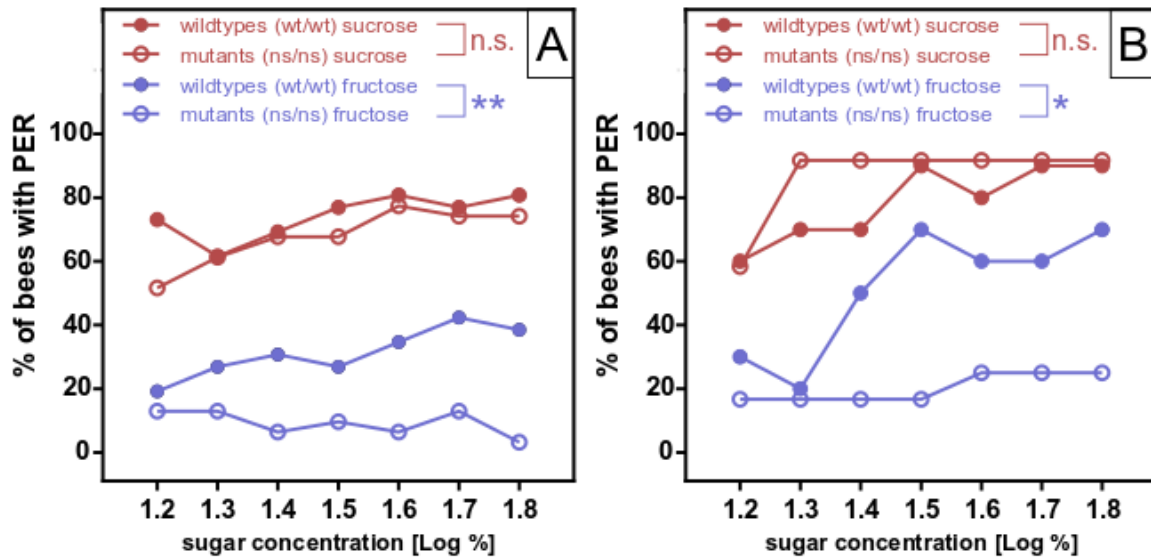

556

557 **Fig. 4: *AmGr3* mutants display a reduced responsiveness to fructose but not to sucrose.**

558 The figures (of replicate A and replicate B) show the percentage of bees responding to a defined sugar  
 559 concentration of either fructose or sucrose (16 %, 20 %, 25 %, 32 %, 40 %, 50 % and 63 %,  
 560 corresponding to a log of 1.2, 1.3, 1.4, 1.5, 1.6, 1.7 and 1.8). Honeybee mutants of the fructose receptor  
 561 *AmGr3* gene (ns/ns - double mutants, circles) are less sensitive to increasing fructose concentrations  
 562 (black) than wildtype bees (wt/wt, dots) (logistic regression [factor genotype] for **fructose - A**: \*\*p=0.005,  
 563  $X^2_{1,399}=8.026$ ,  $N_{(wt/wt)}=26$ ,  $N_{(ns/ns)}=31$  and **fructose - B**: \*p=0.022,  $X^2_{1,154}=5.265$ ,  $N_{(wt/wt)}=10$ ,  $N_{(ns/ns)}=12$ ).  
 564 The same groups do not differ in their sucrose responsiveness (grey) (logistic regression [factor  
 565 genotype] for **sucrose - A**: n.s. p=0.502,  $X^2_{1,399}=0.451$ ,  $N_{(wt/wt)}=26$ ,  $N_{(ns/ns)}=31$  and **sucrose - B**: n.s.  
 566 p=0.446,  $X^2_{1,154}=0.504$ ,  $N_{(wt/wt)}=10$ ,  $N_{(ns/ns)}=12$ ). For statistics also see Table 2.
